1 Combining repetition suppression and pattern analysis provides  
2 new insights into the role of M1 and parietal areas in skilled  
3 sequential actions

4  
5 Abbreviated title: Insights into repetition suppression of skilled actions

6  
7 Eva Berlot<sup>1</sup>, Nicola J. Popp<sup>1</sup>, Scott T. Grafton<sup>2-3</sup>, & Jörn Diedrichsen<sup>1,4,5,\*</sup>

8  
9 <sup>1</sup> The Brain and Mind Institute, University of Western Ontario, London, ON N6A 5B7, Canada

10 <sup>2</sup> Department of Psychological and Brain Sciences, University of California, Santa Barbara, CA 93106,  
11 USA

12 <sup>3</sup> Institute for Collaborative Biotechnologies, University of California, Santa Barbara, CA 93106, USA

13 <sup>4</sup> Department of Statistical and Actuarial Sciences, University of Western Ontario, London, ON N6A 5B7,  
14 Canada

15 <sup>5</sup> Department of Computer Science, University of Western Ontario, London, ON N6A 5B7, Canada

16  
17 Correspondence\*:

18 Jörn Diedrichsen, Brain and Mind Institute, University of Western Ontario, 1151 Richmond St. N.,  
19 London, ON N6A 5B7, Canada, [jdiedric@uwo.ca](mailto:jdiedric@uwo.ca)

20  
21  
22  
23 Conflict of interest statement:

24 The authors declare no competing financial interests.

25  
26 Acknowledgements:

27 The work was supported by an Ontario Trillium Scholarship to EB, an NSERC Discovery Grant (RGPIN-  
28 2016-04890) to JD, and the Canada First Research Excellence Fund (BrainsCAN). We thank Giacomo  
29 Ariani for helpful comments on an earlier version of the manuscript.

## 30 Abstract

31 How does the brain change during learning? In functional magnetic resonance imaging  
32 studies, both multivariate pattern analysis and repetition suppression (RS) have been  
33 used to detect changes in neuronal representations. In the context of motor sequence  
34 learning, the two techniques have provided discrepant findings: pattern analysis showed  
35 that only premotor and parietal regions, but not primary motor cortex (M1), develop a  
36 representation of trained sequences. In contrast, RS suggested trained sequence  
37 representations in all these regions. Here we applied both analysis techniques to a 5-  
38 week finger sequence training study, in which participants executed each sequence  
39 twice before switching to a different sequence. Both RS and pattern analysis indicated  
40 learning-related changes for parietal areas, but only RS showed a difference between  
41 trained and untrained sequences in M1. A more fine-grained analysis, however, revealed  
42 that the RS effect in M1 reflects a fundamentally different process than in parietal areas.  
43 On the first execution, M1 represents especially the first finger of each sequence, likely  
44 reflecting preparatory processes. This effect dramatically reduces during the second  
45 execution. In contrast, parietal areas represent the identity of a sequence, and this  
46 representation stays relatively stable on the second execution. These results suggest  
47 that the RS effect does not reflect a trained sequence representation in M1, but rather a  
48 preparatory signal for movement initiation. More generally, our study demonstrates that  
49 across regions RS can reflect different representational changes in the neuronal  
50 population code, emphasizing the importance of combining pattern analysis and RS  
51 techniques.

## 52 Significance statement

53 Previous studies using pattern analysis have suggested that primary motor cortex (M1)  
54 does not represent learnt sequential actions. However, a study using repetition  
55 suppression (RS) has reported M1 changes during motor sequence learning. Combining  
56 both techniques, we first replicate the discrepancy between them – with learning-related  
57 changes in M1 in RS, but not pattern dissimilarities. We further analysed the  
58 representational changes with repetition, and found that the RS effects differ across  
59 regions. M1's activity represents the starting finger of the sequence, an effect that  
60 vanishes with repetition. In contrast, activity patterns in parietal areas exhibit sequence  
61 dependency, which persists with repetition. These results demonstrate the importance  
62 of combining RS and pattern analysis to understand the function of brain regions.

## 63 Introduction

64 The ability to learn and produce complex sequences of movements is essential for many  
65 everyday activities, from tying shoelaces to playing instruments. Searching for where  
66 these acquired skills are represented in the brain has been one of the central questions  
67 in motor neuroscience (Lashley, 1950). One prominent issue in this debate is whether  
68 skilled sequence execution relies on representations in premotor and supplementary  
69 motor areas, or whether the sequences are represented in the primary motor cortex (M1)  
70 (see Dayan and Cohen, 2011; Berlot et al., 2018 for reviews). We recently conducted a  
71 systematic longitudinal 5-week training study (Berlot et al., 2020) employing functional  
72 magnetic resonance imaging (fMRI) to assess brain changes with motor sequence  
73 learning. We observed no overall change in overall activity with learning in M1, and no  
74 changes in the sequence-specific activity patterns. In contrast, clear learning-related  
75 changes in both overall activity and fine-grained activity patterns were observed in  
76 premotor and parietal areas, suggesting learning-related changes occur outside of M1.  
77 Consistent with this idea, activity patterns in M1 seem to reflect individual movement  
78 elements, but not the sequential context (Yokoi et al., 2018; Yokoi and Diedrichsen, 2019;  
79 Russo et al., 2020). This suggests that M1 does not represent learnt motor sequences,  
80 but must rely on inputs from other areas to select the next correct movement element.

81 Using the technique of repetition suppression, however, Wymbs and Grafton  
82 (2015) provided evidence for learning-related changes during motor sequence learning  
83 in M1. Repetition suppression (RS) refers to the observation that a stimulus repetition  
84 evokes reduced neuronal activity compared to its initial presentation (Gross, Schiller,  
85 Wells, Gerstein, 1967). It is commonly used as a tool for investigating brain  
86 representation (Buckner et al., 1998; Henson et al., 2003; see Segaert et al., 2013 for  
87 review) following the logic that if regional activation reduces upon repetition, the  
88 underlying neuronal population must represent some aspect of the stimulus that  
89 repeated (Grill-Spector et al., 2006). Wymbs and Grafton (2015) found learning-related

90 changes in RS across several regions, including M1, where they reported a non-  
91 monotonic change in RS over weeks – early increase, followed by a decrease, and again  
92 an increase in RS, which they suggested indicates skill-specific specialization in M1.  
93 Altogether, their results indicate that M1’s activity patterns are malleable when learning  
94 motor sequences. This stands in stark contrast to the above-mentioned studies that used  
95 pattern dissimilarity analyses and found no evidence of sequential representation in M1.

96 We reasoned that this discrepancy between RS and pattern analysis may reflect  
97 the fact that different underlying components of activity patterns might bring about the  
98 suppression of activity observed on repetition, some of which may not be directly related  
99 to a sequence identity (Grill-Spector et al., 2006; Alink et al., 2018). To understand RS  
100 effects in more detail, we need to know what aspects of the underlying representations  
101 reduce from the first to the second repetition. We therefore designed a paradigm that  
102 allowed us to investigate changes in brain representation using both tools – RS and  
103 multivariate pattern analysis. We trained healthy volunteers to produce motor sequences  
104 over 5 weeks and tested their performance during high-field (7 T) MRI scanning.  
105 Participants performed trained and untrained sequences, each sequence twice in a row,  
106 allowing us to conduct both pattern and RS analysis on the same data. Replicating  
107 previous results, we observed significant learning-related changes in M1 for RS, but not  
108 for pattern dissimilarities. In contrast, both metrics showed learning-related changes in  
109 premotor and parietal regions. Using pattern analysis, we then decomposed the  
110 activation patterns in the first and second repetition to determine which representational  
111 aspects underlie the RS effects in the different regions. Finally, we performed control  
112 analyses to test whether observed effects could be attributed to learning-related  
113 improvements in the execution speed.

114

## 115 Materials and Methods

### 116 Participants

117 Twenty-seven participants took part in the experiment. Data of one participant were  
118 excluded because the field map was distorted in one of the four scans, resulting in 26  
119 participants whose data was analyzed (17 females, 9 males). Their mean age was 22.2  
120 years (SD = 3.3 years). Criteria for study inclusion were right-handedness and no prior  
121 history of psychiatric or neurological disorders. They provided written informed consent  
122 to all procedures and data usage before the study started. The experimental procedures  
123 were approved by the Ethics Committee at Western University.

124

## 125 Apparatus

126 Finger sequences were performed using a right-hand MRI-compatible keyboard device  
127 (**Fig 1a**). The keys of the device had a groove for each fingertip, with keys numbered 1-  
128 5 for thumb-little finger. The keys were not depressible, so participants performed  
129 isometric finger presses. The force of the presses was measured by the force  
130 transducers underneath each finger groove (FSG-15N1A, Sensing and Control,  
131 Honeywell; dynamic range 0-25 N; update rate 2 ms; sampling 200 Hz). For the key to  
132 be recognized as pressed, the applied force had to exceed 1 N.

133

## 134 Experimental design – learning paradigm

135 Participants were trained over a five-week time period to perform six 9-digit finger  
136 sequences (**Fig 1b**). They were split into two groups, with trained sequences of one  
137 group being the untrained sequences of the second group, and vice versa (see **Fig 4b**  
138 for all of the chosen sequences). The chosen sequences for both groups were matched  
139 as closely as possible on several features: starting finger, number of repetitions per  
140 finger, and first-order finger transitions. The decision to split participants into two groups  
141 was made to ensure that none of the observed effects could be due to the specific set  
142 of sequences chosen.

143 On day 1 of the study, participants were acquainted with the apparatus and the  
144 task performed in the scanner. To ensure no sequence-specific learning would take  
145 place prior to scan 1, we used finger sequences different from the trained and untrained  
146 sets which participants did not encounter at any later stage of the experiment.

147 During the behavioral training sessions, participants were trained to perform the  
148 six sequences. They received visual feedback on the correctness of their presses online  
149 with each digit turning green for correct, and red for incorrect press (**Fig 1a**). They were  
150 instructed to perform the sequences as fast as possible while keeping the overall  
151 accuracy >85%. The details of the training protocol, as well as a few other design  
152 features (which were not assessed for this paper) have been described elsewhere  
153 (Berlot et al., 2020).

154

#### 155 Experimental design – scanning

156 Longitudinal studies assessing learning have to tackle the challenge that performance  
157 changes with learning, and that it is not clear whether brain changes reflect the  
158 acquisition of new skills, or are caused indirectly by the changed behaviour (Poldrack,  
159 2000). For motor learning, the higher speed of execution could lead to different brain  
160 activation, unrelated to learning. Pacing participants to perform at the same speed for  
161 trained and untrained sequences, and across sessions, presents a possible solution for  
162 this problem. On the other side, pacing participants at a slower speed might not tap into  
163 the same neural circuitry as skilled behaviour. For this reason, we decided to include  
164 both approaches; sessions with paced performance and a session where participants  
165 performed at full speed.

166 Participants underwent a total of 4 MRI scanning sessions (**Fig 1c**) while  
167 executing trained and untrained sequences. The first session served as a baseline prior  
168 to the start of the training protocol (in week 1), where the “trained” and “untrained”  
169 sequences were both untrained and seen for equivalent amounts of time. The second

170 session was conducted in week 2, and the last two after training protocol was completed  
171 – in week 5. In scanning sessions 1-3, participants' performance inside the scanner was  
172 paced with a metronome, whereas in session 4, they performed as quickly as possible.  
173 For the purpose of this paper, we analyzed data of scanning session 1 (prior to training  
174 – paced), 3 (after learning – paced) and 4 (after learning – unpaced) (**Fig 1c**), allowing  
175 us to examining learning- and performance-related changes. Session 4 allows for the  
176 closest comparison to the previous RS study (Wymbs and Grafton, 2015) which also  
177 employed a full-speed performance design.

178 Each scanning session consisted of eight functional runs with event-related  
179 design randomly intermixing trials containing the 6 trained and the 6 untrained  
180 sequences (totalling 72 trials per functional run). Each sequence was executed for two  
181 trials in a row (**Fig 1d**). In this way, our design did not differentiate between repetition  
182 suppression and expectation suppression (Summerfield et al., 2008; Kok et al., 2012).  
183 In contrast to perceptual studies, however, in motor studies the influence of the  
184 expectation of a repetition is likely much less important. After the informative cue,  
185 preparatory processes are executed in a full awareness of whether the sequence is  
186 repeated from last trial, no matter if that repetition was expected or not. Thus, repetition  
187 effects in motor control will always contain an element of expectation. For this reason,  
188 we chose repetition to be a predictable feature of our experimental design.

189 Each trial started with a 1-s preparation time with nine digits of the sequence  
190 presented on the screen (**Fig 1d**). A 'go' signal was presented afterwards. In scans 1-3,  
191 a pink line appeared underneath the sequence and started expanding, indicating the  
192 pace at which participants were to press. In scan 4, participants executed the sequence  
193 as fast as possible after the go cue. After execution, they received feedback on their  
194 overall performance – 3 points for correct and 0 for incorrect performance. Each trial  
195 lasted for 5 s total, with a 0.5-s inter-trial interval (**Fig 1d**). Five periods of 10 s rests were



196 added throughout each functional run to provide a better estimate of baseline activation.  
197 These rests were added randomly, but never between the first and second execution of  
198 the same sequence. In total, each scanning session lasted for approximately 75 minutes.

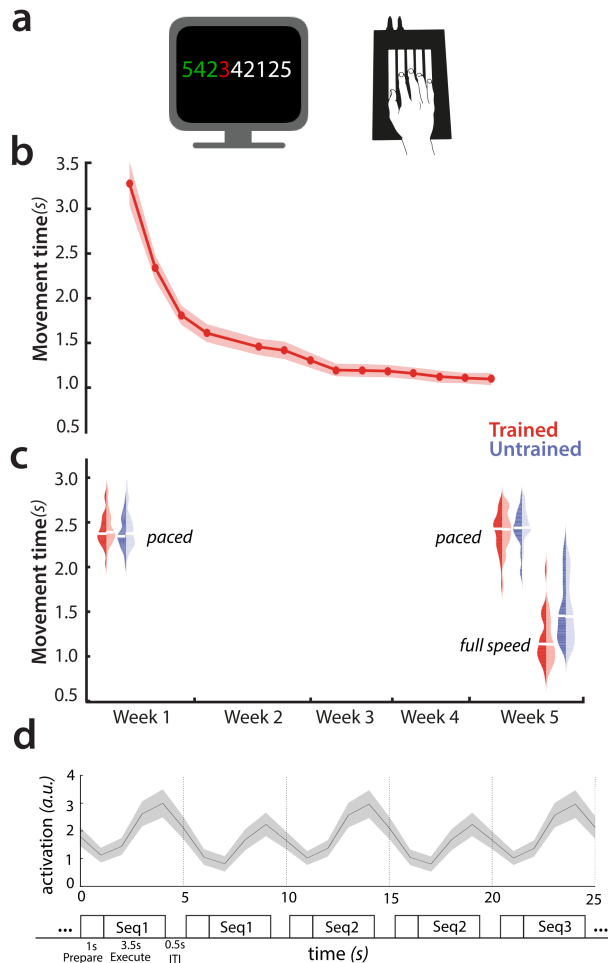

199

200 **Figure 1. Experimental paradigm.** **a)** Experimental setup – finger sequences composed of 9  
201 digits were executed on a keyboard device. Participants received visual feedback on  
202 correctness of their presses – digits turned green for correct presses, red for incorrect presses.  
203 **b)** Group-averaged performance on trained sequences over the 5-week behavioural training  
204 protocol. Red shade indicates the standard error of the group mean. **c)** Group-averaged  
205 performance during the scanning sessions. Trained sequences are in red, untrained in blue.  
206 Dark colour indicates first execution, light second execution. White bars indicate the group mean  
207 performance. **d)** Experimental paradigm inside the scanner. Each sequence was presented  
208 twice in a row. Trials started with a 1-s preparation time in which the sequence was presented,  
209 followed by a 3.5s-period of main phase, when the sequence was also execution, followed by

210 0.5 s of inter-trial interval (ITI). The plotted timeseries for an insert of the design is group-  
211 averaged evoked activation of M1. Shaded error bars indicate the standard error of the mean.  
212

## 213 Image acquisition

214 Data were acquired on a 7-Tesla Siemens Magnetom MRI scanner with a 32-receive  
215 channel head coil (8-channel parallel transmit). At the beginning of the first scan, we  
216 acquired anatomical T1-weighted scan for each participant. This was obtained using a  
217 magnetization-prepared rapid gradient echo sequence (MPRAGE) with voxel size of  
218 0.75x0.75x0.75 mm isotropic (field of view = 208 x 157 x 110 mm [A-P; R-L; F-H],  
219 encoding direction coronal). Data during functional runs were acquired using the  
220 following sequence parameters: GRAPPA 3, multi-band acceleration factor 2, repetition  
221 time [TR] = 1.0 s, echo time [TE] = 20 ms, flip angle [FA] = 30 deg, slice number: 44,  
222 voxel size: 2x2x2 mm isotropic. To estimate magnetic field inhomogeneities, we acquired  
223 a gradient echo field map with the following parameters: transversal orientation, field of  
224 view: 210 x 210 x 160 mm, 64 slices, 2.5 mm thickness, TR = 475 ms, TE = 4.08 ms, FA  
225 = 35 deg. The dataset is publicly available on OpenNeuro (accession number  
226 ds002776).

227

## 228 Preprocessing and first level analysis

229 Data preprocessing was carried out using SPM12. Preprocessing of functional data  
230 included correcting for geometric distortions using the acquired field map data, and  
231 head motion correction (3 translations: x, y, z; 3 rotations: pitch, roll yaw). The data  
232 across sessions were all aligned to the first run of the first session, and then co-registered  
233 to the anatomical scan.

234 Preprocessed data were analysed using a general linear model (GLM; Friston et  
235 al., 1994). We defined a regressor for each of the performed 12 sequences (6 trained, 6  
236 untrained), separately for their first and second execution – resulting in a total of 24  
237 regressors per run. The regressor was a boxcar function defined for each trial, and

238 convolved with a two-gamma canonical hemodynamic response function (time to peak:  
239 5.5 s, time to undershoot: 12.5 s). All instances of sequence execution were included  
240 into estimating regressors, regardless of whether the execution was correct or  
241 erroneous. This analysis choice was also taken by Wymbs and Grafton (2015), thus  
242 allowing a more direct comparison of repetition suppression results. Even when the error  
243 trials were excluded (i.e. removing all error trials as well as second execution trials when  
244 the first execution was erroneous), our results remained unchanged. Ultimately, the first  
245 level analysis resulted in activation images (beta maps) for each of the 24 conditions per  
246 run, for each of the four scanning sessions.

247

#### 248 Surface reconstruction and regions of interest

249 Individual subject's cortical surfaces were reconstructed using FreeSurfer (Dale et al.,  
250 1999), and aligned to the FreeSurfer's Left-Right symmetric template (Workbench's 164  
251 nodes template) via spherical registration. To examine sequence representation across  
252 the cortical surface, we defined searchlights (Oosterhof et al., 2011). A searchlight was  
253 defined for each surface node, encompassing a circular neighbourhood region  
254 containing 120 voxels. As a slightly coarser alternative to searchlights, we also defined  
255 a regular tessellation of the cortical surface separated into small hexagons.

256 For our regions of interest (ROI), we defined areas covering the primary motor  
257 cortex and secondary associative regions. The primary motor cortex (M1) was defined  
258 using probabilistic cytoarchitectonic map (Fischl et al., 2008) by including nodes with  
259 the highest probability of belonging to Brodmann area (BA) 4 which in addition  
260 corresponded to the hand knob area (Yousry et al., 1997). The dorsal premotor cortex  
261 (PMd) was included as the lateral part of the middle frontal gyrus. The anterior part of  
262 the superior parietal lobule (SPLa) was defined to include anterior, medial and ventral  
263 intraparietal sulcus.

264

## 265 Evoked activation and repetition suppression

266 We calculated the percent signal change for execution of each sequence relative to the  
267 baseline activation for each voxel. The calculation was split between the first and second  
268 execution (**Fig 1d**).

269 To calculate repetition suppression, the activation during the first execution was  
270 subtracted from the elicited activation during the second execution. Thus, negative  
271 values of this difference contrast represented relative suppression of activation on the  
272 second execution, i.e. repetition suppression. For most subsequent analyses, the  
273 obtained values of activation and repetition suppression were averaged separately for  
274 trained and the untrained sequences. For ROI analysis, the volume maps were averaged  
275 across the predefined regions (M1, PMd, SPLa) in the native volume space of each  
276 subject. Additionally, for visualization the volume maps were projected to the surface for  
277 each subject, and averaged across the group in Workbench space.

278

## 279 Dissimilarities between activity patterns for different sequences

280 To evaluate which regions displayed sequence-specific representation, we calculated  
281 Crossnobis dissimilarities between the evoked beta patterns of individual sequences. To  
282 do so, we first multivariately prewhitened the beta values – i.e. we standardized them by  
283 voxels' residuals and weighted by the voxel noise covariance matrix. We used optimal  
284 shrinkage towards a diagonal noise matrix following the Ledoit and Wolf (2004)  
285 procedure. Such regularized prewhitening has been found to increase the reliability of  
286 dissimilarity estimates (Walther et al., 2016). Next, we calculated the crossvalidated  
287 Mahalanobis dissimilarities (i.e. the Crossnobis dissimilarities) between evoked regional  
288 patterns of different pairs of sequences, resulting in a total of 66 dissimilarities. This was  
289 performed twice: once by combining the activation patterns across the two executions  
290 and second time by separately obtaining dissimilarities between evoked patterns split  
291 per execution. The obtained dissimilarities were then averaged overall, as well as

292 separately within the pairs of trained sequences, and the untrained sequences. This  
293 analysis was conducted separately for each ROI and using a surface searchlight  
294 approach (Oosterhof et al., 2011). In the searchlight approach, dissimilarities were  
295 calculated amongst the voxels of each searchlight, with the resulting dissimilarities  
296 values assigned to the centre of the searchlight.

297

### 298 Changes in dissimilarities with repetition

299 We then related the change in dissimilarities with repetition to the changes in overall  
300 activity. As a starting point, we considered the possibility that repetition suppression  
301 simply scaled the entire activity pattern downward. To test for this possibility, we first  
302 computed the ratio of activation change:  $\frac{\text{act}_{\text{exe2}}}{\text{act}_{\text{exe1}}}$ . Based on this value, we could compute

303 what dissimilarities would be predicted on the second execution if representation  
304 decreased proportional to the decrease in activation ( $\text{diss}_{\text{pred}} = \frac{\text{act}_{\text{exe2}}}{\text{act}_{\text{exe1}}} \times \text{diss}_{\text{exe1}}$ ). This  
305 was then contrasted with the observed dissimilarities on execution 2 ( $\text{diss}_{\text{exe2}} - \text{diss}_{\text{pred}}$ ).

306 A positive difference indicates that dissimilarities decrease relatively less with repetition  
307 than the reduction in average activation. This would indicate a relatively sharper  
308 representation on the second execution. In contrast, a negative difference would reflect  
309 a further reduction in dissimilarities relative to that obtained in activation. This would  
310 suggest that with repetition, representation decreases relatively more than activation.

311

### 312 Pattern component analyses: modelling representational components

313 To determine what specific features of the patterns might change across the two  
314 executions, we decomposed the pattern component modelling toolbox (PCM;  
315 Diedrichsen et al., 2011, 2017). PCM models the covariance structure (second moment  
316 matrix) of regional activity patterns according to different representational hypotheses.

317 In our experiment based on presented sequences, we defined five representational  
318 components.

319 *1) First finger*

320 Both trained and untrained sequences started with one of three possible fingers: thumb,  
321 middle or little finger. The first finger component predicts that activity pattern for  
322 sequences that start with the same finger are identical. For sequences starting with a  
323 different first finger, the prediction was based on the covariance of the natural statistics  
324 of hand movement (Ejaz et al., 2015).

325 *2) All fingers*

326 The sequences were slightly different in terms of which fingers were involved. The 'all  
327 fingers' component simply characterized how often each finger occurred in each  
328 sequence. If two sequences consisted exactly of the same presses (just in a different  
329 order), they were predicted to be identical. The predicted covariance was again  
330 weighted by the natural statistics of hand movement (Ejaz et al., 2015).

331 *3) Sequence type*

332 This component split the performed sequences based on whether they were trained or  
333 untrained, predicting one regional activity patterns for all the trained and a different  
334 activity pattern for all the untrained sequences.

335 *4) Trained sequence identity*

336 This component modelled any differences between the 6 trained sequences.

337 *5) Untrained sequence identity*

338 Similar as the trained sequence identity, this component predicted a unique activity  
339 patterns for each untrained sequence.

340

341 The overall predicted second moment matrix ( $G$ ) was then a convex combination  
342 of the component matrices ( $G_c$ ), each weighted by a positive component weight  $\exp(\theta_j)$ .

343

$$G = \sum_c \exp(\theta_c) G_c$$

344 The construction of the model components was done separately for the two groups of  
345 participants, as different sequences constituted 'trained' or 'untrained' sequences for the  
346 two groups. The subsequent steps of model fitting and evaluation were carried together  
347 for all subjects.

348 We formulated a model family containing all possible combinations of the five  
349 chosen components (Yokoi and Diedrichsen, 2019). This resulted in 32 combinations,  
350 also containing the 'null' model that predicted no differences amongst any of the  
351 sequence patterns. We evaluated all of the 32 models using a crossvalidated leave-one-  
352 subject-out scheme. The components weights were fitted to maximize the likelihood of  
353 the data the data of subject 1,...,N-1. We then evaluated the likelihood of the observed  
354 regional activity patterns of subject N under that model. The resultant cross-validated  
355 likelihoods were used as model evidence for each model (see Diedrichsen et al. 2017).  
356 The log model Bayes Factor  $BF_m$ , the difference between the crossvalidated log-  
357 likelihood of each model and the null model, characterises the relative evidence for that  
358 model.

359 In addition to the model family of the chosen components, we also fit a 'noise-  
360 ceiling' model to assess maximal  $\log BF_m$  that would be achievable for a group model  
361 (Nili et al., 2014; Diedrichsen et al., 2017). For each of the two groups, we predicted the  
362 second moment matrix of a left-out subject based on n-1 subjects in the same group.  
363 This metric of inter-subject consistency was then combined across the subjects of the  
364 two groups.

365 To integrate the results across models, we used model averaging. Assuming a  
366 uniform prior probability across models, we first computed the posterior probability of  
367 each model and region directly from the log-Bayes factors:

368

369 
$$posterior_m = \frac{\exp(\log BF_m)}{\sum_{j=1}^c \exp(\log BF_j)}$$

370

371 The posterior probability was used to calculate two subsequent metrics: 1) component  
372 log-Bayes factor, and 2) variance accounted for by each component. The log-Bayes  
373 factor for each component (first finger, all fingers, etc.) was calculated as the log of the  
374 ratio between the posterior probability for the models containing the component (c=1)  
375 versus the models that did not (c=0).

376 
$$\log BF_c = \log \left( \frac{\frac{1}{N_{m:c=1}} \sum_{m:c=1} posterior_m}{\frac{1}{N_{m:c=0}} \sum_{m:c=0} posterior_m} \right)$$

377 where  $N_{m:c=1}$  ( $N_{m:c=0}$ ) denotes the number of models (not) containing the component  
378 (Shen and Ma, 2019). The component log-Bayes factor is monotonically related to the  
379 posterior probability of model components.

380 To determine the amount of pattern variance accounted for by each component  
381 (across the models), we normalized the trace of each model component to be 12  
382 (number of conditions) prior to fitting. Thus, the fitted component weight  $\exp(\Theta_{i,m})$   
383 indicates the amount of variance accounted for by the component  $i$  in the context of  
384 model  $m$ . The model-averaged amount of variance accounted for by each component  $c$   
385 was then calculated as:

386 
$$variance_c = \sum_{m=1}^{32} posterior_m \exp(\Theta_{c,m})$$

387 Important to note is that the estimated variance is always positive, such that this quantity  
388 cannot be used to test whether a component is present at all. On the other hand, the log-  
389 Bayes factor does not take into account the actual weighting of the component in  
390 explaining the activity patterns. In univariate models, the average variance accounted



391 for is tightly related to the evidence for that component- however this is not necessarily  
392 the case in the multivariate setting. While component *c1* can be crucial to account for  
393 the covariance between the patterns, it may actually play a relative small role in  
394 predicting the activity patterns. Thus, both the component Bayes factor and the  
395 averaged explained variance provide informative, albeit slightly different, measures of  
396 the importance of a component.

397

### 398 Statistical analysis of repetition suppression and dissimilarities

399 We employed a within-subject design. For each subject's data, we calculated repetition  
400 suppression (RS) and dissimilarities, separately for trained and untrained sequences.  
401 This was done for each region and session. To statistically quantify how RS and  
402 dissimilarities changed with learning (across sessions for trained / untrained  
403 sequences), we performed a session x sequence type ANOVA on those metrics, in  
404 predefined ROIs. Afterwards, we used a two-sided paired t-test to assess the effect of  
405 sequence type per session. We additionally performed a three-way session x region x  
406 sequence type ANOVA to examine if the learning-related effects differed across regions.  
407 For the analysis of dissimilarities split by execution (execution 1 vs. 2), we calculated,  
408 per subject, the expected crossnobis dissimilarities for execution 2 of the cortical surface  
409 regions. The observed dissimilarities on the second execution were contrasted with  
410 those by using a two-sided paired t-test.

411

### 412 Statistical analysis of pattern component modelling

413 We report the component log-Bayes factors, averaged across subjects. Additionally, the  
414 log-Bayes factors were submitted to a one-sample t-test against 0 (two-sided). To  
415 quantify the change in component variance across executions, we calculated, per  
416 subject, the percent reduction in component variance from execution 1 to 2. The relative

417 reduction in variance with repetition was contrasted across components by using a two-  
418 sided paired t-test.

419

## 420 Results

### 421 Changes in repetition suppression with learning

422 To examine learning-related changes in repetition suppression and pattern analysis, we  
423 calculated both metrics on fMRI activation patterns both pre- and post-learning (i.e.  
424 weeks 1 and 5). Relative to rest, sequence execution activated primary motor cortex  
425 (M1), primary somatosensory cortex (S1), dorsal and ventral premotor cortex (PMd and  
426 PMv), supplementary motor area (SMA) and the anterior superior parietal lobules (SPLa;  
427 **Fig 2a**). In general, activity was higher for the first than for the second execution (**Fig**  
428 **2b**). Repetition suppression was calculated as the difference in activity between the two  
429 executions of the same sequence (Exe 2 – Exe 1). Negative values indicate a relative  
430 reduction in activation with repetition, i.e., repetition suppression (RS). Already in week  
431 1, prior to learning, RS was observed in nearly all regions displaying task-evoked  
432 activation (**Fig 2c**). Only in regions that showed de-activation during task performance  
433 (blue shades in **Fig 2b**), did we observed positive difference values between the  
434 executions (areas in red shades in **Fig 2c**). This indicates that, both the amount of  
435 activation and the amount of deactivation reduced with repetition.

436 We statistically quantified how RS changed across weeks (specifically between  
437 sessions 1 and 4) for three predefined regions of interest: SPLa, PMd, and M1. The  
438 increase in RS across session was higher for trained than untrained sequences in all  
439 regions (**Fig 2d**), as confirmed by significant session x sequence type interactions  
440 (SPLa:  $F_{(1,25)}=17.44$ ;  $p=3.1e^{-4}$ , PMd:  $F_{(1,25)}=7.27$ ,  $p=1.1e^{-6}$ ,  $F_{(1,25)}=25.09$ ;  $p=3.6e^{-4}$ ). The  
441 increase in RS was particularly strong in M1. Indeed, the three-way interaction of region

442 x session x sequence type was significant ( $F_{(2,50)}=9.19$ ,  $p=3.9e^{-4}$ ). To summarize the RS  
 443 results, all regions showed evidence of an increase of sequence-specific representation  
 444 with learning, with a particularly strong effect in M1.

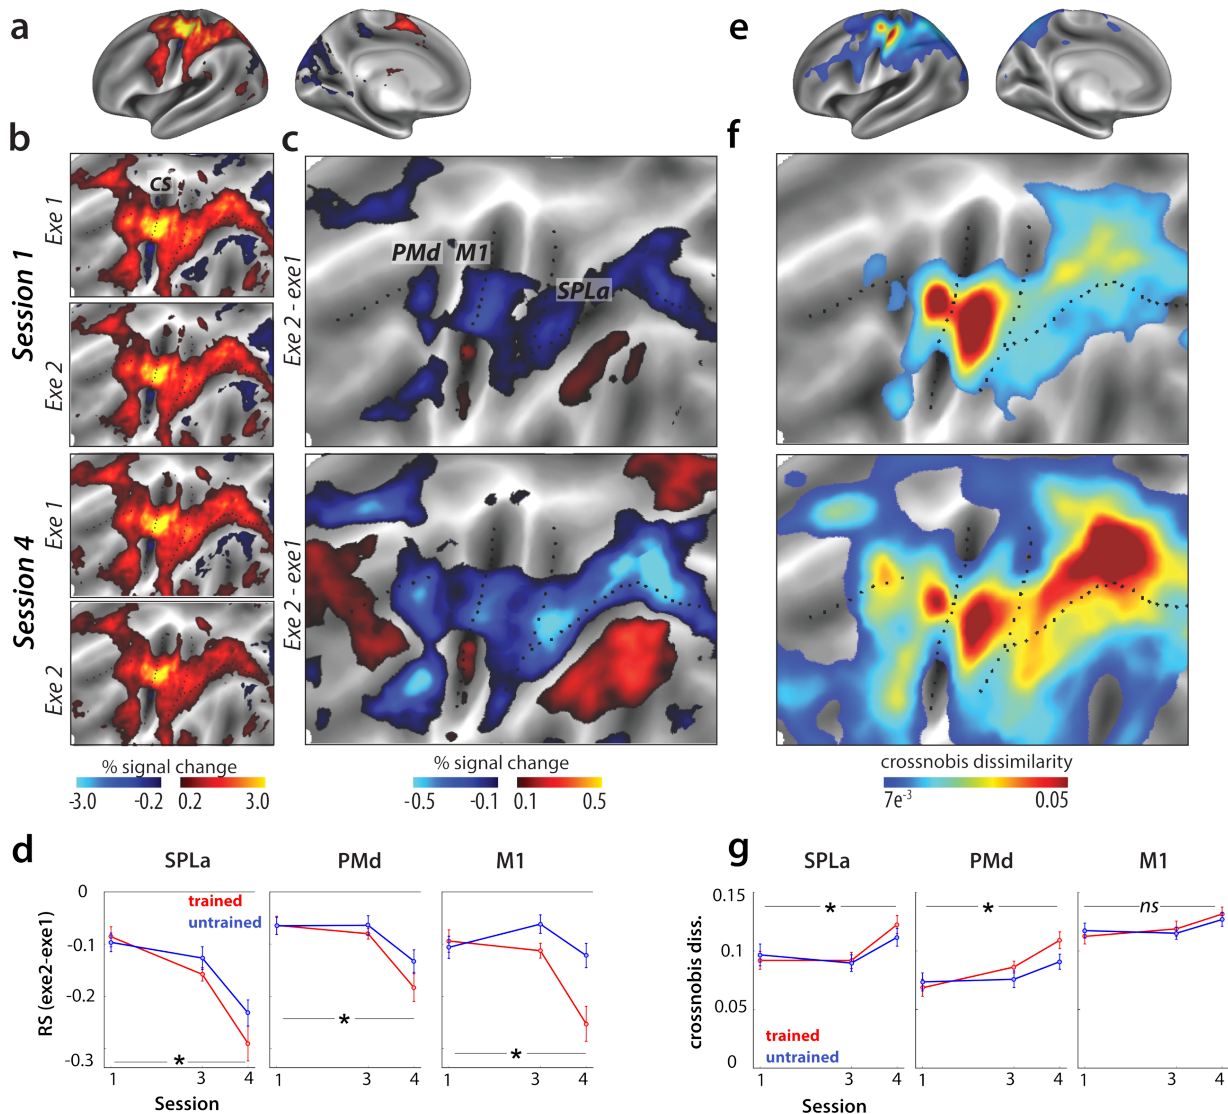

445  
 446 **Figure 2. Changes in repetition suppression and dissimilarities with learning.** **a)** Group-  
 447 averaged evoked activation, measured as percent signal change over resting baseline in week  
 448 1, averaged across all sequences and projected to an inflated representation of the left  
 449 hemisphere, i.e. hemisphere contralateral to the performing hand. **b)** Group-averaged activation  
 450 for each execution (Exe1, Exe2), in the baseline session (Session 1 – Week 1) and after training  
 451 (Session 4 – Week 5) represented on a flattened representation of the left hemisphere. CS stands  
 452 for the central sulcus. **c)** The difference in evoked activation between the two executions. Blue  
 453 represents relative suppression of activation on the second, relative to the first, execution.

454 Regions of interest: primary motor cortex (M1), dorsal premotor cortex (PMd), anterior superior  
455 parietal lobule (SPLa). **d)** Repetition suppression in the predefined regions of interest, separately  
456 for trained (red) and untrained (blue) sequences. Error bars reflect the standard error of the  
457 group. More negative values indicate more suppression during second execution, relative to the  
458 first. \* signals  $p < .05$ . **e)** Average dissimilarity between evoked patterns for all pairs of sequences,  
459 in week 1, averaged across the group. Pattern dissimilarity was computed using a searchlight  
460 approach, by calculating the average crossnobis dissimilarity of activation patterns between all  
461 sequence pairs in each searchlight. **f)** Average dissimilarity between activation patterns of  
462 different sequence pairs in weeks 1 and 4. **g)** Dissimilarities between trained (red) and untrained  
463 (blue) sequence patterns, across weeks 1 and 5. Error bars reflect the standard error of the  
464 group. \* signals  $p < .05$ .

465

## 466 Changes in pattern dissimilarities with learning

467 As another measure of sequence-specific representations, we tested whether the  
468 regions that displayed RS also showed distinguishable fine-grained activity patterns for  
469 each sequence. As a measure of pattern dissimilarity, we calculated the average  
470 crossvalidated Mahalanobis dissimilarity (i.e., crossnobis dissimilarity) between  
471 activation patterns of all possible sequence pairs. Overall, regions with dissimilar activity  
472 patterns for the different sequences corresponded to regions which also exhibited RS  
473 effects (**Fig 2e-f**). Additionally, both metrics (RS and pattern dissimilarities) increased  
474 from session 1 to 4, with the effect particularly pronounced in the parietal cortex (**Fig 2c,**  
475 **f**). Thus, based on visual inspection, RS and pattern dissimilarity metrics seem to provide  
476 consistent evidence for the development of sequence-specific representations with  
477 learning in an overlapping set of regions.

478 However, when quantifying the change in pattern dissimilarities across weeks in  
479 predefined ROIs, we observed important differences from RS. In SPLa and PMd, pattern  
480 dissimilarities increased more for trained than untrained sequences across sessions (**Fig**  
481 **2g**), as quantified by a significant interaction in a session x sequence type ANOVA  
482 (SPLa:  $F_{(1,25)}=4.80$ ;  $p=.038$ , PMd:  $F_{(1,25)}=5.29$ ,  $p=.030$ ). In contrast, the week by sequence

483 type interaction was not significant in M1 (**Fig 2g**;  $F_{(1,25)}=2.13$ ,  $p=.16$ ). This indicates that  
484 while PMd and SPLa show learning-related changes on the level of pattern  
485 dissimilarities, these are absent in M1. The three-way interaction (region x session x  
486 sequence type) on the observed dissimilarities was indeed significant ( $F_{(2,50)}=3.39$ ,  
487  $p=0.041$ ), confirming the difference between regions.

488

#### 489 Pattern dissimilarities reduce with repetition

490 Within the same dataset, we observed learning-related changes in RS in M1, but no  
491 change in pattern dissimilarities with learning. While the increase in pattern dissimilarities  
492 (**Fig 2f**), as well as direct evidence for pattern changes across weeks (Berlot et al., 2020),  
493 clearly argue that sequence-specific learning occurs in premotor and parietal areas and  
494 not in M1, RS provides evidence for the development of sequence-specific  
495 representations in all these regions. How can this discrepancy be explained? To resolve  
496 this question, we need to understand how the role that each area plays during skilled  
497 sequence performance changes from the first to the second execution. We first  
498 inspected pattern dissimilarities for each of the two executions separately (execution 1,  
499 execution 2) in the trained state (Week 5 / Session 4). We observed that, on average,  
500 pattern dissimilarities in week 5 decreased with repetition in most cortical regions (**Fig**  
501 **3a**). This decrease was particularly pronounced around the central sulcus, including M1  
502 (**Fig 3b**).

503 Of course some decrease in dissimilarities would be expected given the decrease  
504 of overall activity with repetition (**Fig 2d**). We therefore compared the decrease in  
505 dissimilarities to what would be predicted if activation decreased proportionally for all  
506 sequences. First we calculated the relative decrease in activity – i.e. the ratio of the  
507 activity during the second execution over the activity during the first. This ratio was  
508 applied to the observed dissimilarities on the first execution, yielding a prediction of what

509 dissimilarities would be expected for the second execution, if representation scaled with  
510 activation. This calculation was applied to activity patterns to each of the parcels on a  
511 regularly tessellated cortical surface (**Fig 3c**). Around the central sulcus, i.e. including  
512 M1, the observed dissimilarities on the second execution were significantly lower than  
513 what was predicted from the reduction in overall activity (**Fig 3c**). In contrast, observed  
514 dissimilarities on the second execution in premotor and parietal areas were quite close  
515 to the prediction from activation reduction. Altogether this indicates that representational  
516 change with repetition differed across regions: proportional scaling of representation in  
517 parietal regions, and violation of proportional scaling in M1, where a much more  
518 pronounced decrease of dissimilarities was observed.

519

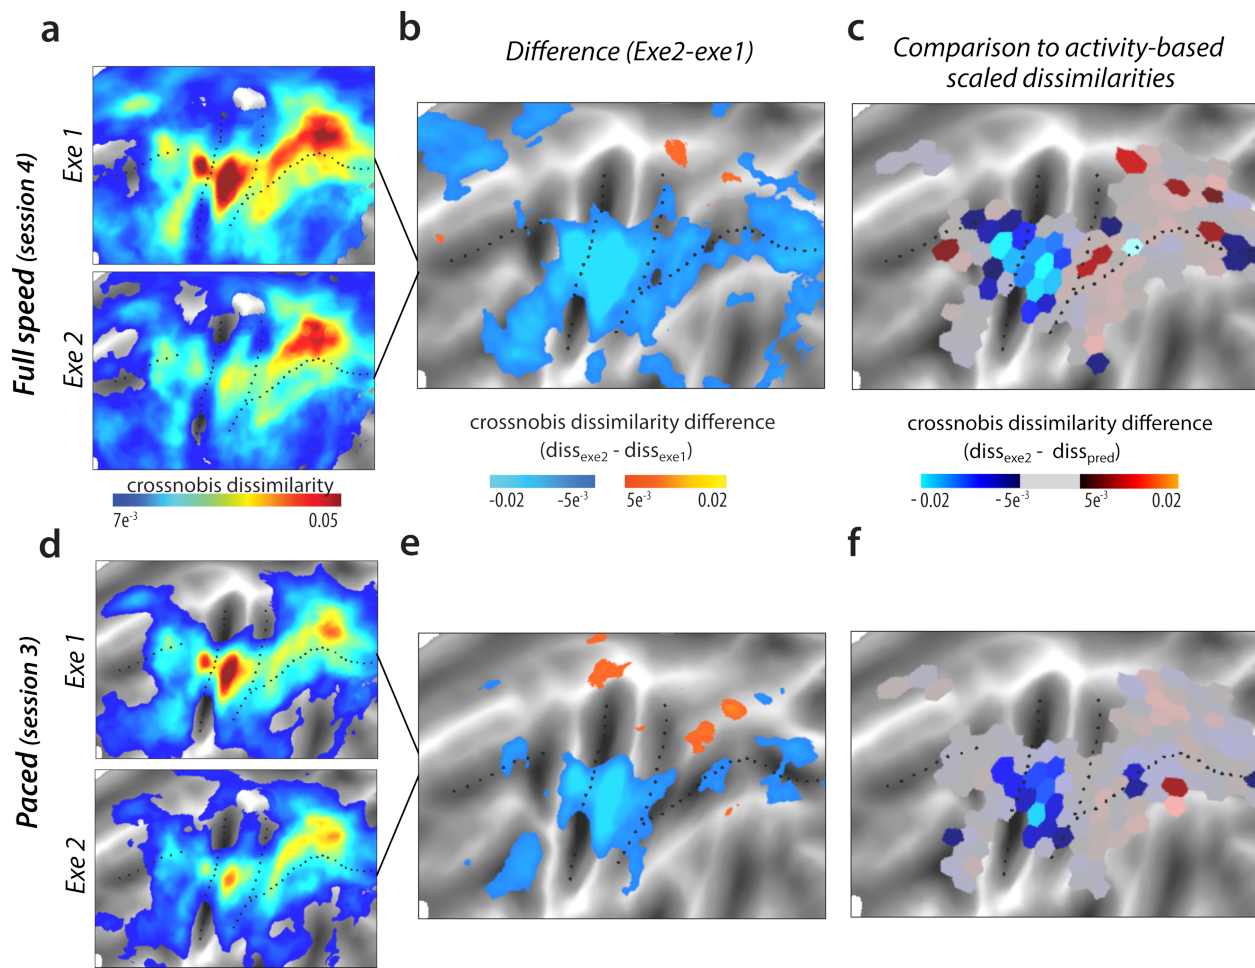

520

521 **Figure 3. Representational change with repetition of sequence execution. a)** Dissimilarities  
522 between pairs of sequences in session 4, split by first and second executions. **b)** Difference in  
523 pattern dissimilarities between executions 1 and 2. Blue hues reflect relatively lower  
524 dissimilarities on the second execution. **c)** Difference between the observed dissimilarity during  
525 execution 2 and the predicted distance based on the reduction of activation with repetition. Blue  
526 hues indicate lower dissimilarities than predicted, red higher. The difference between the two  
527 was significant with  $p < .05$  in tessels which are fully visible (i.e. not greyed out). **d-f):** Same as **a-**  
528 **c** but for the paced speed session, i.e. session 3. Same thresholds were applied to the  
529 visualizations as the respective figures from a-c.

530

531 Decomposing representations across executions 1 and 2

532 Analysis of average dissimilarities across executions revealed a compression of  
533 representation in M1, but not in parietal regions. This analysis, however, does not reveal  
534 which aspects of the representations are responsible for this regional difference. To  
535 investigate exactly how the representation changed, we decomposed the  
536 representations during each execution into several underlying representational  
537 components. Differences in the sequence patterns could reflect differences in various  
538 characteristics, or features (**Fig 4a**). Specifically, based on previous results (Yokoi et al.,  
539 2018; Yokoi and Diedrichsen, 2019), we hypothesized that the covariance (or similarity)  
540 between activity patterns can be explained with the following 5 components (**Fig 4b**, see  
541 **Methods** for details): 1) *first finger*: a pattern component determined by the starting  
542 finger, 2) *all fingers*: a pattern component that simply adds the finger-specific patterns  
543 regardless of their sequence, 3) *sequence type*: trained and untrained sequences have  
544 different average patterns, 4) *trained sequence identity*: the trained sequences differ  
545 amongst each other, 5) *untrained sequence identity*: the untrained sequences differ  
546 amongst each other. Using pattern component modelling (Diedrichsen et al., 2017), we  
547 constructed a model family, which consisted of all possible combinations of those 5  
548 components, totalling  $2^5 = 32$  models. These models were then fit to the observed  
549 regional covariance structure (second moment matrices; **Fig 4c**), separately for

550 executions 1 and 2. In all regions and across both executions, several models accounted  
551 for observed data well, with model fits as good as the noise ceiling model (M1: 21 models  
552 for exe 1, 24 for exe 2; PMd: 16 for exe 1 and 2, SPLa: 16 for exe 1 and 2), showing that  
553 overall these models accounted well for the observed data. To integrate the results  
554 across models, we used Bayesian model averaging to estimate which components  
555 were most important to explain the patterns.

556 In M1, the regional representation on the first execution was accounted for by the  
557 individual movement elements (all fingers), with especially high weight on the first finger  
558 (**Fig 4d**). This replicates the previous findings showing that M1's representation during  
559 sequence production tasks can be fully explained by the starting finger (Yokoi et al.,  
560 2018; Yokoi and Diedrichsen, 2019). In these two studies, the number of times each of  
561 the five fingers was pressed was held constant across all sequences. In the current  
562 study, we did not match this number. Thus, the subsequent finger presses, encoded in  
563 the 'all finger' component, also accounted for substantial variance, independent of the  
564 exact ordering of these movements.

565 To statistically quantify these effects, we calculated component Bayes factors for  
566 individual components. In M1, the Bayes factors were significant for both first and all  
567 finger factors (first finger:  $BF=6.8$ ,  $t_{(25)}=3.1$ ,  $p=4.8e^{-3}$ ; all fingers:  $BF=9.6$ ,  $t_{(25)}=4.4$ ,  $p=1.7e^{-4}$ ).  
568 In contrast, the component Bayes factors were not significant for any sequence-  
569 related feature – neither sequence type ( $BF_c=3.2$ ,  $t=1.9$ ,  $p=.07$ ), nor sequence identity:  
570 of trained sequences ( $BF_c=1.6$ ,  $t_{(25)}=1.5$ ,  $p=.16$ ) or untrained sequences ( $BF_c=0$ ,  $t_{(25)}=-$   
571  $0.2$ ,  $p=.85$ ). Thus, the pattern analysis clearly shows that activity patterns during the first  
572 execution in M1 can be explained by a superposition of individual movements, without  
573 any evidence of a sequence representation.

574 In SPLa and PMd, the variance explained during the first execution was well  
575 accounted for by sequence type (SPLa:  $BF_c=16.3$ ,  $t_{(25)}=6.0$ ,  $p=3.0e^{-6}$ , PMd:  $BF=15.5$ ,  
576  $t_{(25)}=5.94$ ,  $p=3.3e^{-4}$ ), and trained sequence identity (SPLa:  $BF_c=5.4$ ,  $t_{(25)}=3.4$ ,  $p=2.5e^{-3}$ ;



577 PMd:  $BF_c=4.6$ ,  $t_{(25)}=2.8$ ,  $p=.011$ ). There was no significant evidence for representation of  
578 untrained sequence identity in either of the regions (SPLa:  $BF_c=0.8$ , PMd:  $BF=0.1$ ;  
579  $t_{(25)}\leq 1.1$ ,  $p\geq .28$ ). In comparison to M1, the variance related on individual movements  
580 – either the first finger or all fingers were weaker across PMd and M1. In PMd the first  
581 finger still accounted for some variance ( $BF_c=4.1$ ), but this was further reduced in SPLa  
582 ( $BF_c=0.5$ ).

583 In M1, the pattern component related to the first finger drastically reduced by 93%  
584 with repetition (**Fig 4d**). The reduction in variance explained by the first finger component  
585 was larger than for the all finger component, which reduced by 75% (paired t-test:  
586  $t_{(25)}=9.03$ ,  $p=2.4e^{-9}$ ). This indicates that the drastic reduction of average dissimilarities in  
587 M1 with repetition is mostly due a pronounced first-finger effect during the first execution  
588 that almost vanishes on the second execution.

589 Large reductions in first finger effect were also observed in session 4 in PMd (by  
590 81%) and SPLa (by 83%). In contrast, the representation of sequence type and trained  
591 sequence identity in these areas clearly reduced less (PMd: sequence type: 44%,  
592 trained sequence: 64%; SPLa: sequence type: 49%, trained sequence: 55%). To  
593 statistically quantify whether the first finger effect reduced more than trained sequence  
594 component, we performed a paired t-tests on the percentage reduction across the two  
595 components. The results of tests were indeed significant for both PMd ( $t_{(25)}=7.96$ ,  $p=2.6\cdot$   
596  $10^{-8}$ ) and SPLa ( $t_{(25)}=12.8$ ,  $p=1.7e^{-12}$ ).

597 In summary, SPLa's regional activation patterns were better accounted for by  
598 components related to the sequence identity than to the first finger, which also reduced  
599 much less with repetition. This likely explains why the average dissimilarities did not  
600 compress with repetition in SPLa regions as much as in M1. With repetition, the  
601 proportion of different components to overall regional representation remained relatively  
602 stable in SPLa (**Fig 4e**), but changed substantially in M1 in that the dominant first-finger  
603 representation on the first execution nearly disappeared on the second execution. PMd's

604 representation was in-between those of M1 and SPLa – more variance was accounted  
 605 for by the first finger than in SPLa, but less than in M1.

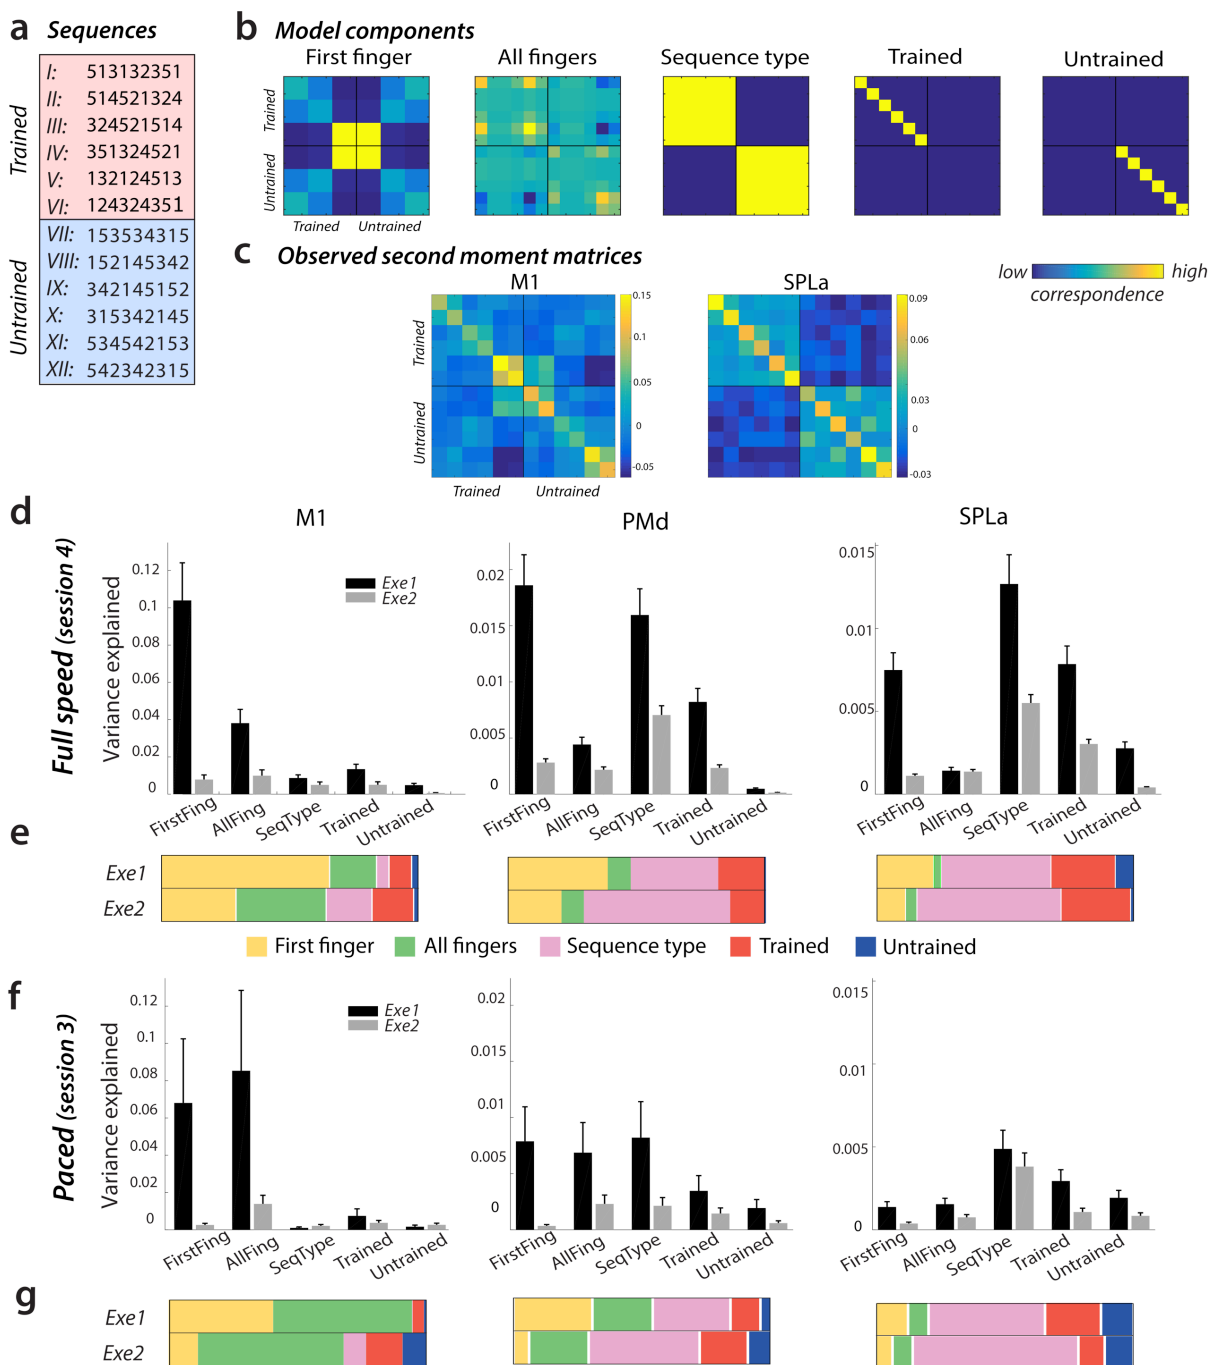

606  
 607 **Figure 4. Component decomposition of regional representation across executions 1 and**  
 608 **2. a)** Executed 9-digit sequences. **b)** Candidate component models used to assess regional  
 609 representations across first and second executions. Each row and column indicate a specific  
 610 sequence, and values in the matrices reflect the correspondence across sequences on that

611 component, with yellow indicating higher correspondence. **c)** Regional representations during  
612 the first execution of sequences, as assessed by the crossvalidated second moment matrix,  
613 averaged across subjects of group 1. Similar as for models, each row and column reflect an  
614 activation pattern for an individual sequence. Regions: primary motor cortex (M1) and anterior  
615 superior parietal lobule (SPLa). **d)** Variance explained by candidate model components on  
616 executions 1 (black) and 2 (grey) during the full speed session in M1, PMd (dorsal premotor  
617 cortex) and SPLa. **e)** Relative contribution of variance explained in d) across the different  
618 components. The total variance explained across the different components (i.e. sum of the bars  
619 in d) was normalized across the two executions to display the relative shift of importance of  
620 different representational components. **f-g)**: Same depiction as **d-e** for the results of activity  
621 patterns during the paced scanning session.

622

623 Speed of execution does not affect RS, but it overall alters the balance  
624 between first- and all-finger representations

625 It is important to note that the speed of execution differed between trained and untrained  
626 sequences in session 4 (**Fig 1c**). This speed difference could conflate the observed  
627 effect of learning. To control for this factor, we had designed the study to include an  
628 extra session, session 3, which was also performed after learning was completed, but  
629 with paced performance. Specifically, the movement speed in session 3 was matched  
630 between trained and untrained sequences, as well as to performance observed in  
631 session 1.

632 We have previously reported that after learning, crossnobis dissimilarities for  
633 trained sequences are affected by the speed of execution. Specifically, the  
634 dissimilarities between trained sequences were lower for paced session (session 3) than  
635 full speed session 4 in PMd and SPLa, but not in M1, where there was no distinction  
636 between trained and untrained dissimilarities in either session (Berlot et al., 2020; **Fig 2g**  
637 – comparison session 3-4). Similarly, RS in PMd and SPLa was also less pronounced in  
638 session 3. The RS did not differ significantly between trained and untrained sequences  
639 in session 3 ( $t_{(25)} \leq 1.22$ ,  $p > .23$ ; **Fig 2d**). However in M1, the difference in RS between

640 the two sequence types was significant already in session 3 ( $t_{(25)}=2.1$ ,  $p=0.046$ ). The  
641 nature of this significance is less clear since RS for neither trained nor untrained  
642 sequences changed significantly from session 1 to 3. Still, it points to the fact that the  
643 presence of learning-related effects (as characterized from session 1 to 4) in M1 for RS,  
644 but no change in dissimilarities cannot be simply explained by the speed of execution.

645 Next, we compared whether the speed of execution affects the decrease in  
646 dissimilarities on repetition. As for the full speed performance, we observed that  
647 dissimilarities decreased on the second execution (**Fig 3d-e**). Additionally, as reported  
648 for the full speed performance, this reduction in dissimilarities was particularly  
649 pronounced around the central sulcus (**Fig 3f**) also when performance was paced with  
650 the metronome.

651 Finally, we assessed whether the reduction in representational components on  
652 repetition (especially the finger effect in M1) is observed even during paced  
653 performance. Overall, our PCM modelling accounted for less variance during the paced  
654 performance compared to full speed performance (**Fig 4d,f**). We have previously  
655 reported that the patterns of activity are much more distinguishable and have higher  
656 signal-to-noise ratio during the full speed session compared to paced performance  
657 (Berlot et al., 2020), which likely accounts for this difference.

658 Interestingly, the overall amount of the first- vs. all-finger components varied with  
659 speed. During full speed performance the first finger component accounted for a larger  
660 part of the pattern variance than during paced performance (**Fig 4d-g**). This was  
661 confirmed by an significant interaction of a session x component (first / all fingers)  
662 ANOVA in M1 ( $F_{(1,25)}=17.3$ ,  $p=3.3e^{-4}$ ). Nevertheless, a similar reduction of the first-finger  
663 effect in M1 was observed for the paced session as for the full speed session (first finger  
664 reduction by 92%, all finger by 66%;  $t_{(25)} = 3.12$ ,  $p=4.5e^{-3}$ ), suggesting that the decrease  
665 of the first finger weight on repetition did not depend on the speed of execution. The

666 reductions in first finger effect were larger than for trained sequence components also  
667 in PMd and SPLa (PMd:  $t_{(25)}=2.34$ ,  $p=0.02$ ; SPLa:  $t_{(25)}=8.11$ ,  $p=1.8e^{-8}$ ). Altogether this  
668 confirms that the larger reduction of the first finger effect with repetition does not depend  
669 on the speed of performance.

670

## 671 Discussion

672 In the present study, we combined two fMRI analysis techniques to investigate brain  
673 underpinnings of learning motor sequences: pattern analysis and repetition suppression.  
674 Both techniques showed the development of sequence specific representations in  
675 premotor and parietal cortex. In contrast, only RS provided evidence for a sequence  
676 learning in M1. In this study, we carefully investigated how the activity patterns in these  
677 regions changed from the first to the second repetition, which offers an explanation for  
678 these discrepant findings, and which leads us to a speculative model of parietal – M1  
679 interactions in skilled sequence performance.

680

### 681 Learning-related changes of RS and pattern dissimilarities

682 Several pattern analysis fMRI studies have failed to provide evidence that M1 obtains a  
683 motor sequence representation with learning (Wiestler and Diedrichsen, 2013; Yokoi et  
684 al., 2018; Berlot et al., 2020). In contrast, one study (Wymbs and Grafton, 2015) reported  
685 learning-related changes in RS even for M1, which suggests a development of  
686 sequence-dependent representation. We first replicated that these two metrics provide  
687 discrepant insights into M1 – we observed evidence for learning-related changes using  
688 RS, but not pattern dissimilarities. In additional control analysis, we also showed that this  
689 difference was not due by a higher sensitivity of RS to speed of execution. The results of  
690 the session with paced performance showed that RS in M1 was stronger for trained than  
691 untrained sequences even for paced performance, whereas pattern dissimilarities did

692 not differ between trained and untrained sequences for either full speed or paced  
693 sessions.

694 As Wymbs & Grafton (2015), we found changes in RS in M1 across learning  
695 sessions, as well as a difference between trained and untrained sequences in sessions  
696 post-training. However, the specific evolution of the changes differed between the two  
697 studies. Wymbs and Grafton reported a complex increase-decrease-increase pattern of  
698 RS in M1 depending on the level of the training of the sequence. In contrast, we report  
699 higher RS for trained than untrained sequences after training. There are a number of  
700 important differences in the design of the two studies which could have contributed to  
701 the observed differences in results. For instance, their design only employed full speed  
702 performance, the probability of sequence repetition was lower (50%), and the training  
703 was longer and had three groups of sequences (highly, medium, and lightly trained)  
704 rather than just two (trained and untrained). Further studies, directly manipulating any of  
705 the aforementioned differences, are needed to reconcile the findings reported here  
706 relative to the previous report of Wymbs & Grafton (2015).

707

## 708 Representational changes with repetition

709 Reduced activity with repetition is commonly interpreted as an indication that the region  
710 represents the dimension of the stimulus along which the repetition occurred (Grill-  
711 Spector et al., 2006). For example, if a region shows less activity every time the colour  
712 of a visual stimulus repeats (rather than the shape, texture, etc.), it would provide  
713 evidence for a role of the region in the analysis of colour. However, a more complex  
714 reason for repetition suppression could be that the region's role changes with repetition.  
715 To test for this possibility, we decomposed regional representations into different  
716 underlying components (e.g. first finger, combination of all fingers, sequence identity,  
717 etc.) separately for the first and second execution. We observed that M1 mainly  
718 represents the first finger in a sequence. This component diminishes dramatically on a

719 repetition. In contrast, the representation of sequence type and identity, which  
720 accounted for most of the variance in parietal areas, remained more stable across the  
721 two executions. Activation patterns in PMd reflected a mixture between these two  
722 extremes. Similarly to parietal cortex, sequence type and identity components remained  
723 stable with repetition. The substantial contribution of the first finger component on the  
724 first execution, however, diminished with repetition. This suggests that PMd's  
725 representation is a mixture of more abstract sequence representations (as in parietal  
726 regions) and representations related to single movements (as in M1). Altogether, our  
727 results suggest that RS acts differently on different components of neuronal  
728 representations. Depending on the representational composition of each region, RS can  
729 therefore be more or less pronounced.

730

731 Interactions between cortical motor regions during sequence performance  
732 These findings can be summarized in the following - admittedly rather speculative -  
733 model of how parietal/premotor areas and M1 interact during skilled motor sequence  
734 performance. During the first execution, premotor and parietal regions contain  
735 information about the specific sequence that needs to be executed (**Fig 5**). Premotor  
736 regions also reflect the starting finger of the sequence. These regions may send signals  
737 to M1, pre-activating the neural circuits for the movement of the first finger. This  
738 replicates a previous finding that the difference between M1's activation patterns is  
739 explained by the starting finger, rather than true sequence representation (Yokoi et al.,  
740 2018). The finding is also consistent with results from neurophysiology (Averbeck et al.,  
741 2002) and magneto-encephalography (MEG; Kornysheva et al., 2019) showing that the  
742 first action in a sequence is most highly activated in premotor and motor areas during  
743 the preparatory period.

744 Upon repetition of the same sequence, activation reduces across all regions. The  
745 decomposition analysis of the regional representations indicates that the sequence

746 identity component in premotor and parietal regions reduces only moderately,  
747 suggesting that the sequence representation is always necessary for successfully  
748 guiding M1 through the correct sequences of actions. In contrast, the pre-activation of  
749 the first finger reduced dramatically, possibly reflecting reduced planning needs on  
750 repetition (Ariani et al., 2020). Thus, the especially pronounced RS effect in M1 may be  
751 due to the fact that fMRI activity here is driven to a large degree by the initial input from  
752 other regions that prepares this region for the first execution of a sequence. On the  
753 second execution, the need for this pre-activation may be substantially reduced.

754

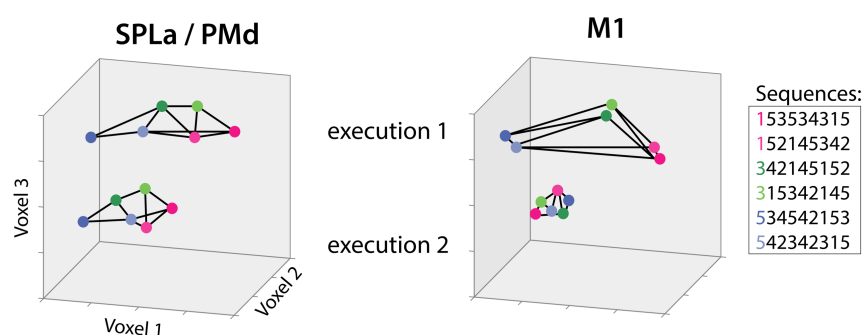

755

756 **Figure 5. Conceptual depiction of changes in representation across regions and with**  
757 **repetition.** Different dots represent activation patterns for different finger sequences. Regions:  
758 anterior superior parietal lobule (SPLa), dorsal premotor cortex (PMd), primary motor cortex  
759 (M1). Activation levels of three hypothetical voxels are indicated across the 3 axes.

760

761 Overall, our results suggest that M1 does not represent individual trained  
762 sequences with learning, despite increased RS. Instead, it appears to represent  
763 individual finger presses. If this is true, why was RS in M1 stronger for trained than  
764 untrained sequences? fMRI activity reflects a combination of the input to a cortical  
765 region, as well as the recurrent activity within that region (Logothetis, 2002), but not the  
766 output spiking (Picard et al., 2013). We suggest that the effect may be due to changed  
767 input, reflecting changes in the communication between higher-order areas and M1,  
768 which may become more efficient with repetition of trained sequences. Some support  
769 for this idea comes from a recent study demonstrating layer-specific effects in M1



770 (Persichetti et al., 2019). By measuring changes in cerebral blood volume across layers,  
771 the authors demonstrated that superficial M1 layers (which reflect M1 inputs) show RS,  
772 whereas deep layers' activation (which is more indicative of M1's outputs) is enhanced  
773 during repetition. Since the BOLD signal is biased towards the superficial vascular  
774 signals, our activation results more likely reflect inputs into M1.

775         However, rather than input from other areas, increased RS in M1 could reflect  
776 sequence dependency at a subvoxel resolution (Grill-Spector and Malach, 2001; Grill-  
777 Spector et al., 2006), which cannot be detected by pattern analyses. A prior  
778 electrophysiology study provided some support for this, demonstrating differential M1's  
779 responses to trained relative to random sequences (Matsuzaka et al., 2011). However,  
780 this study did not show differential activation for different trained sequences, thus no  
781 sequence representation as defined here. Moreover, recent electrophysiological studies  
782 have also shown that M1 does not represent the sequential context (Russo et al., 2020;  
783 Zimnik and Churchland, 2021). Altogether, this makes it unlikely that the RS observed in  
784 M1 reflects sequence dependency.

785         Our proposed model makes a number of predictions that could be tested using a  
786 combination of techniques. For layer-specific fMRI studies, we would predict that the  
787 first finger effect in M1 can be mostly found in the superficial layers, reflecting cortico-  
788 cortico communication. For MEG or intracranial EEG studies (Ghuman et al., 2008;  
789 Gilbert et al., 2010; Korzeniewska et al., 2020) we would predict that the difference  
790 between trained and untrained sequences would be mainly present at the start of the  
791 sequence, an effect that would strongly reduce on repetition. Addressing these  
792 questions will advance our understanding of motor sequence on neural circuitry  
793 underlying production of skilled actions.

794

795 Conclusion

796 We demonstrated here that RS may not only reflect a suppression of a specific  
797 representation in a region, but that the role of the region, and hence the structure of the  
798 representation, can change qualitatively from the first to the second repetition. While the  
799 representation of the skilled motor sequences remained relatively stable in parietal and  
800 premotor regions, the M1's representation changed, with a strongly reduced activation  
801 related to the beginning of the sequence. These results emphasize that employing RS  
802 only using the average regional activation sometimes provides incomplete, and possibly  
803 misleading, insights into regional representation. Instead, the combination of RS with  
804 pattern analyses can illuminate how representations change with repetition, and may  
805 provide a deeper understanding of brain circuits and their function.

## 806 References

- 807 Alink A, Abdulrahman H, Henson RN (2018) From neurons to voxels - repetition suppression is best  
808 modelled by local neural scaling. *Nat Commun* 9:1–10 Available at:  
809 <https://www.biorxiv.org/content/early/2017/07/31/170498>.
- 810 Ariani G, Pruszynski JA, Diedrichsen J (2020) Motor planning brings human primary somatosensory  
811 cortex into movement-specific preparatory states. *bioRxiv:2020.12.17.423254* Available at:  
812 <https://doi.org/10.1101/2020.12.17.423254> [Accessed March 24, 2021].
- 813 Averbach BB, Chafee M V, Crowe DA, Georgopoulos AP (2002) Parallel processing of serial movements  
814 in prefrontal cortex. *PNAS* 99:13172–13177.
- 815 Barron HC, Vogels TP, Emir UE, Makin TR, O’Shea J, Clare S, Jbabdi S, Dolan RJ, Behrens TEJ (2016)  
816 Unmasking Latent Inhibitory Connections in Human Cortex to Reveal Dormant Cortical Memories.  
817 *Neuron* 90:191–203 Available at: <http://dx.doi.org/10.1016/j.neuron.2016.02.031>.
- 818 Berlot E, Popp NJ, Diedrichsen J (2018) In search of the engram, 2017. *Curr Opin Behav Sci* 20.  
819 Berlot E, Popp NJ, Diedrichsen J (2020) A critical re-evaluation of fMRI signatures of motor sequence  
820 learning. *Elife* 9:1–24.
- 821 Buckner RL, Goodman J, Burock M, Rotte M, Koutstaal W, Schacter D, Rosen B, Dale AM (1998)  
822 Functional-Anatomic Correlates of Object Priming in Humans Revealed by Rapid Presentation  
823 Event-Related fMRI. *20:285–296*.
- 824 Dale AM, Fischl B, Sereno MI, Dale AM (1999) Cortical Surface-Based Analysis. *Neuroimage* 9:179–194  
825 Available at:  
826 <http://www.ncbi.nlm.nih.gov/pubmed/9931268%0Ahttp://linkinghub.elsevier.com/retrieve/pii/S1053>  
827 [811998903950](http://www.ncbi.nlm.nih.gov/pubmed/9931268%0Ahttp://linkinghub.elsevier.com/retrieve/pii/S1053811998903950).
- 828 Dayan E, Cohen LG (2011) Neuroplasticity subserving motor skill learning. *Neuron* 72:443–454 Available  
829 at: <http://dx.doi.org/10.1016/j.neuron.2011.10.008>.
- 830 Diedrichsen J, Ridgway GR, Friston KJ, Wiestler T (2011) Comparing the similarity and spatial structure  
831 of neural representations: A pattern-component model. *Neuroimage* 55:1665–1678 Available at:  
832 <http://dx.doi.org/10.1016/j.neuroimage.2011.01.044>.
- 833 Diedrichsen J, Yokoi A, Arbutckle SA (2017) Pattern component modeling: A flexible approach for  
834 understanding the representational structure of brain activity patterns. *Neuroimage*.
- 835 Ejaz N, Hamada M, Diedrichsen J (2015) Hand use predicts the structure of representations in  
836 sensorimotor cortex. *Nat Neurosci* 18:1034–1040 Available at:  
837 <http://dx.doi.org/10.1038/nn.4038%5Cnpapers3://publication/doi/10.1038/nn.4038>.
- 838 Fischl B, Rajendran N, Busa E, Augustinack J, Hinds O, Yeo BTT, Mohlberg H, Amunts K, Zilles K (2008)  
839 Cortical folding patterns and predicting cytoarchitecture. *Cereb Cortex* 18:1973–1980.
- 840 Friston KJ, Worsley KJ, Poline J-PB, Frith CD, Frackowiak RSJ, Holmes a. P, Worsley KJ, Poline J-PB,  
841 Frith CD, Frackowiak RSJ (1994) Statistical parametric maps in functional imaging: A general linear  
842 approach. *Hum Brain Mapp* 2:189–210 Available at: <http://doi.wiley.com/10.1002/hbm.460020402>.
- 843 Fritsche M, Lawrence SJD, de Lange FP (2020) Temporal tuning of repetition suppression across the  
844 visual cortex. *J Neurophysiol* 123:224–233.
- 845 Grafton ST, Hamilton AFDC (2007) Evidence for a distributed hierarchy of action representation in the  
846 brain. *26:590–616*.
- 847 Grill-Spector K, Henson R, Martin A (2006) Repetition and the brain: Neural models of stimulus-specific  
848 effects. *Trends Cogn Sci* 10:14–23.
- 849 Grill-Spector K, Malach R (2001) fMRI-adaptation: A tool for studying functional properties of human  
850 cortical neurons. *Acta Psychol (Amst)* 107:293–321.
- 851 Gross, C.G., Schiller, P.H., Wells, C., Gerstein GL (1967) Single-unit activity in temporal association  
852 cortex of the monkey. *J Neurophysiol* 30:833–843.
- 853 Henson RN, Ganel T, Otten LJ (2003) Electrophysiological and Haemodynamic Correlates of Face  
854 Perception, Recognition and Priming. :793–805.
- 855 Kok P, Jehee JFM, de Lange FP (2012) Less Is More: Expectation Sharpens Representations in the  
856 Primary Visual Cortex. *Neuron* 75:265–270.
- 857 Kornysheva K, Bush D, Meyer SS, Sadnicka A, Barnes G, Burgess N (2019) Neural Competitive Queuing  
858 of Ordinal Structure Underlies Skilled Sequential Action. *Neuron* 101:1166–1180.e3.
- 859 Lashley K (1950) In search of the engram.
- 860 Ledoit O, Wolf M (2004) Honey, I shrank the sample covariance matrix. *J Portf Manag* 30:110–119  
861 Available at: <https://jpm.pm-research.com/content/30/4/110> [Accessed March 24, 2021].
- 862 Logothetis NK (2002) The neural basis of the blood-oxygen-level-dependent functional magnetic  
863 resonance imaging signal. *Philos Trans R Soc B Biol Sci* 357:1003–1037.
- 864 Matsuzaka Y, Picard N, Strick PL, Barnes TD, Mao J, Hu D, Kubota Y, Dreyer A a, Brown EN, Graybiel  
865 AM, Kilavik BE, Confais J, Ponce-alvarez A, Diesmann M, Riehle A (2011) Skill Representation in  
866 the Primary Motor Cortex After Long-Term Practice Skill Representation in the Primary Motor Cortex  
867 After Long-Term Practice. *J Neurophysiol:1819–1832*.
- 868 Nili H, Wingfield C, Walther A, Su L, Marslen-Wilson W, Kriegeskorte N (2014) A Toolbox for

- 869 Representational Similarity Analysis. *PLoS Comput Biol* 10:e1003553.
- 870 Noppeney U, Price CJ (2004) An fMRI Study of Syntactic Adaptation. *J Cogn Neurosci* 16:702–713.
- 871 Oosterhof NN, Wiestler T, Downing PE, Diedrichsen J (2011) A comparison of volume-based and  
872 surface-based multi-voxel pattern analysis. *Neuroimage* 56:593–600 Available at:  
873 <http://dx.doi.org/10.1016/j.neuroimage.2010.04.270>.
- 874 Persichetti AS, Avery JA, Huber L, Merriam EP, Martin A (2019) Layer-Specific Contributions to Imagined  
875 and Executed Hand Movements in Human Primary Motor Cortex. *SSRN Electron J*:1–5.
- 876 Picard N, Matsuzaka Y, Strick PL (2013) Extended practice of a motor skill is associated with reduced  
877 metabolic activity in M1. *Nat Neurosci* 16:1340–1347 Available at:  
878 [http://www.pubmedcentral.nih.gov/articlerender.fcgi?artid=3757119&tool=pmcentrez&rendertype=](http://www.pubmedcentral.nih.gov/articlerender.fcgi?artid=3757119&tool=pmcentrez&rendertype=abstract)  
879 [abstract](http://www.pubmedcentral.nih.gov/articlerender.fcgi?artid=3757119&tool=pmcentrez&rendertype=abstract).
- 880 Poldrack RA (2000) Imaging brain plasticity: Conceptual and methodological issues - A theoretical  
881 review. *Neuroimage* 12:1–13.
- 882 Russo AA, Khajeh R, Bittner SR, Perkins SM, Cunningham JP, Abbott LF, Churchland MM (2020) Neural  
883 Trajectories in the Supplementary Motor Area and Motor Cortex Exhibit Distinct Geometries,  
884 Compatible with Different Classes of Computation. *Neuron* 107:745–758.e6 Available at:  
885 <https://doi.org/10.1016/j.neuron.2020.05.020>.
- 886 Segaert K, Weber K, de Lange FP, Petersson KM, Hagoort P (2013) The suppression of repetition  
887 enhancement: A review of fMRI studies. *Neuropsychologia* 51:59–66 Available at:  
888 <http://dx.doi.org/10.1016/j.neuropsychologia.2012.11.006>.
- 889 Shen S, Ma WJ (2019) Variable precision in visual perception. *Psychol Rev* 126:89–132 Available at:  
890 [/pmc/articles/PMC6318066/](https://pmc/articles/PMC6318066/) [Accessed March 24, 2021].
- 891 Shmuelof L, Zohary E (2005) Dissociation between Ventral and Dorsal fMRI. 47:457–470.
- 892 Summerfield C, Trittschuh EH, Monti JM, Mesulam MM, Egner T (2008) Neural repetition suppression  
893 reflects fulfilled perceptual expectations. *Nat Neurosci* 11:1004–1006.
- 894 Walther A, Nili H, Ejaz N, Alink A, Kriegeskorte N, Diedrichsen J (2016) Reliability of dissimilarity  
895 measures for multi-voxel pattern analysis. *Neuroimage* 137:188–200 Available at:  
896 <http://dx.doi.org/10.1016/j.neuroimage.2015.12.012>.
- 897 Weiner KS, Sayres R, Vinberg J, Grill-Spector K (2010) fMRI-adaptation and category selectivity in  
898 human ventral temporal cortex: Regional differences across time scales. *J Neurophysiol* 103:3349–  
899 3365.
- 900 Wiestler T, Diedrichsen J (2013) Skill learning strengthens cortical representations of motor sequences.  
901 *Elife* 2013:1–20.
- 902 Wymbs NF, Grafton ST (2015) The human motor system supports sequence-specific representations  
903 over multiple training-dependent timescales. *Cereb Cortex* 25:4213–4225.
- 904 Yokoi A, Arbuckle SA, Diedrichsen J (2018) The role of human primary motor cortex in the production of  
905 skilled finger sequences. *J Neurosci* 38:1430–1442.
- 906 Yokoi A, Diedrichsen J (2019) Neural Organization of Hierarchical Motor Sequence Representations in  
907 the Human Neocortex. *Neuron* 103:1178–1190.e7.
- 908 Yousry TA, Schmid UD, Alkadhi H, Schmidt D, Peraud A, Buettner A, Winkler P (1997) Localization of the  
909 motor hand area to a knob on the precentral gyrus. A new landmark. *Brain* 120:141–157.
- 910 Zimnik, Andrew J., Churchland MM (2021) Independent generation of sequence elements by motor  
911 cortex. *Nat Neurosci*:1–13.
- 912
